# Supplementary material for: Association of Estimated Pulse Wave Velocity and Metabolic Markers With Cognitive Impairment Risk in Diabetes
Source: Research Square preprint supplement (doi:10.21203/rs.3.rs-7835974/v1), 2025-11-03
Supplement: Supplementary file 1 [file 0ef4ac885f268c98c21e8919.docx]

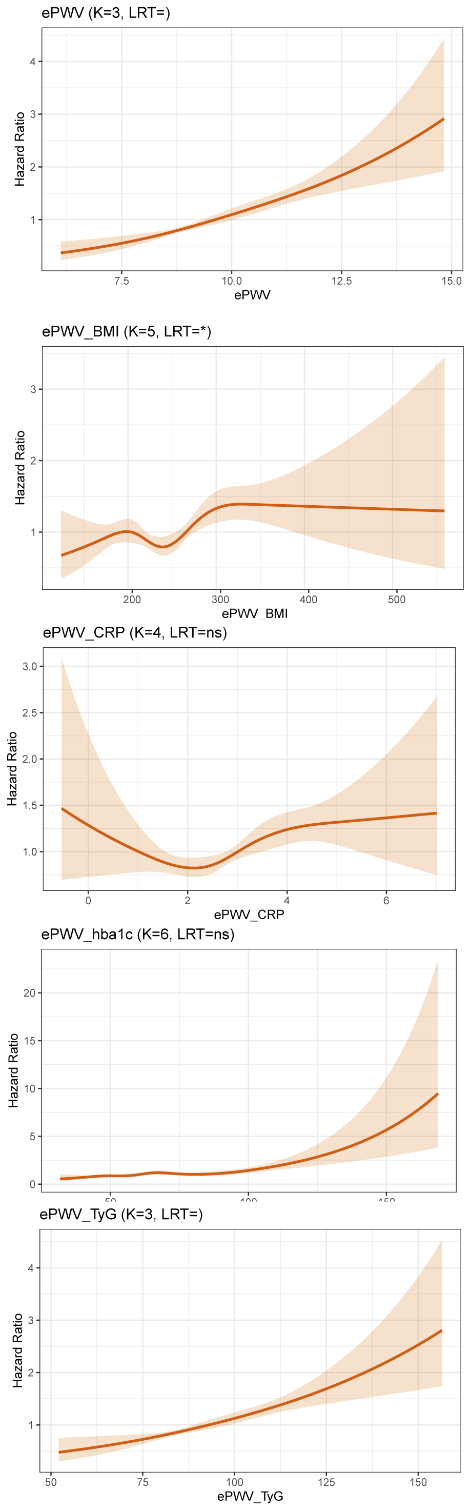


**Figure S1. Optimal K-nodes number for different variables in RCS-COX analysis.** . ePWV, estimated pulse wave velocity; BMI, Body mass index; CRP, C-reactive protein; TyG, Triglyceride-Glucose Index.
