# Supplementary material for: Association of Estimated Pulse Wave Velocity and Metabolic Markers With Cognitive Impairment Risk in Diabetes
Source: Research Square preprint supplement (doi:10.21203/rs.3.rs-7835974/v1), 2025-11-03
Supplement: Supplementary file 2 [file c2ef509a4914d003e5fecc81.docx]

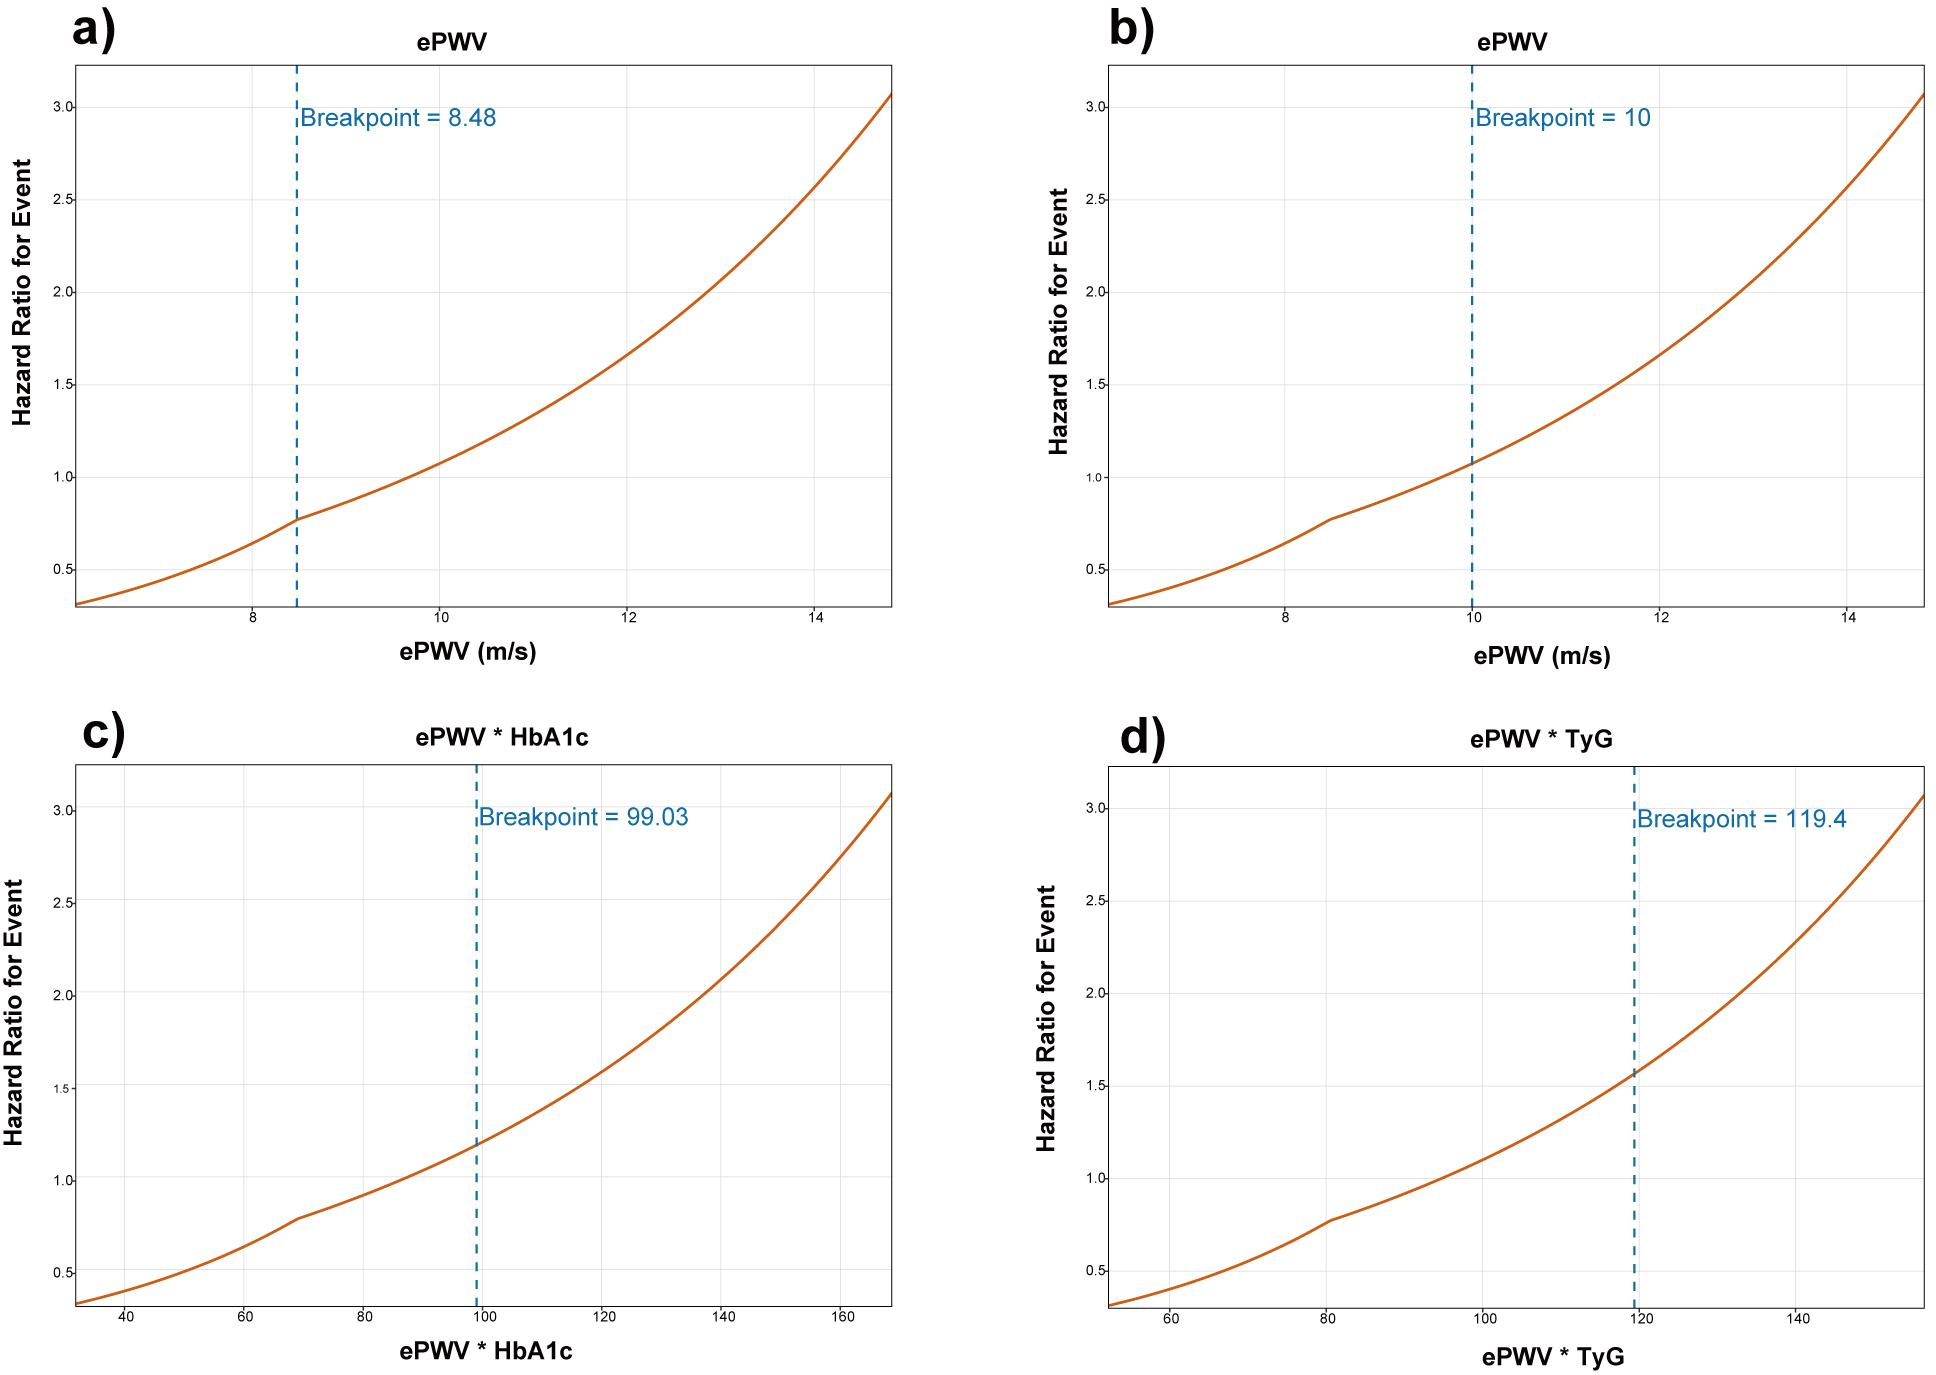


**Figure S3. Cut-point identified in two-piece wise regression.** ePWV, estimated pulse wave velocity; BMI, Body mass index; CRP, C-reactive protein; TyG, Triglyceride-Glucose Index.
