# Supplementary material for: Association of Estimated Pulse Wave Velocity and Metabolic Markers With Cognitive Impairment Risk in Diabetes
Source: Research Square preprint supplement (doi:10.21203/rs.3.rs-7835974/v1), 2025-11-03
Supplement: Supplementary file 3 [file f90896c2430bde4cc6e04e1c.docx]

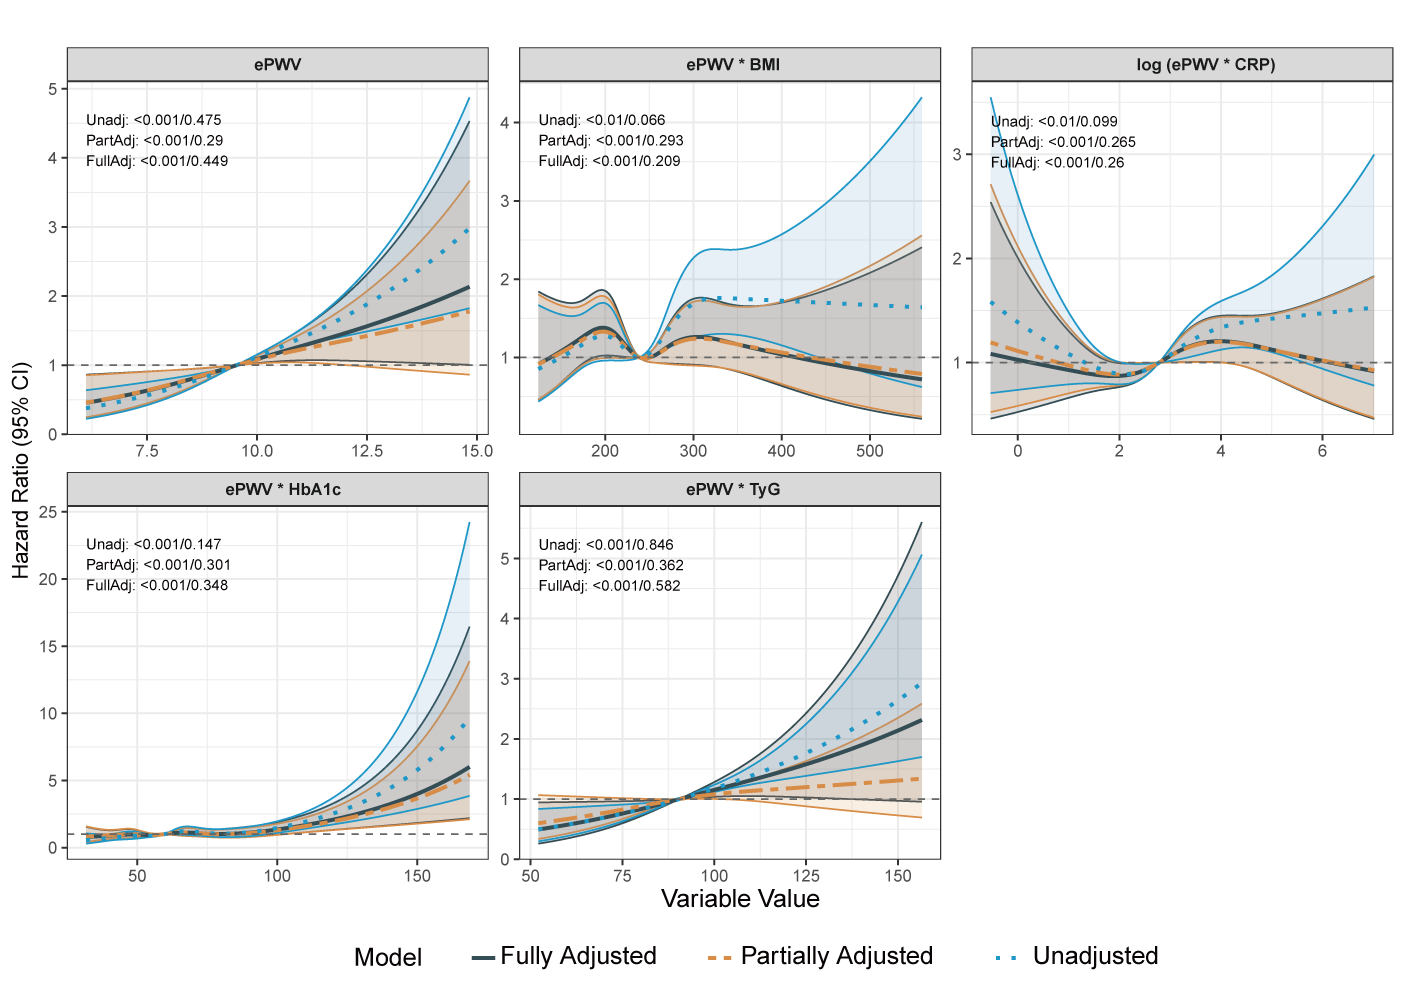


**Figure S2. RCS-COX analysis**. ePWV, estimated pulse wave velocity; BMI, Body mass index; CRP, C-reactive protein; TyG, Triglyceride-Glucose Index.
